# Supplementary material
Source: PubMed Central journal article supplement (PMC3509723)
Supplement: supp_139.24.4601_DEV081737.pdf [file supp_139.24.4601_DEV081737.pdf]

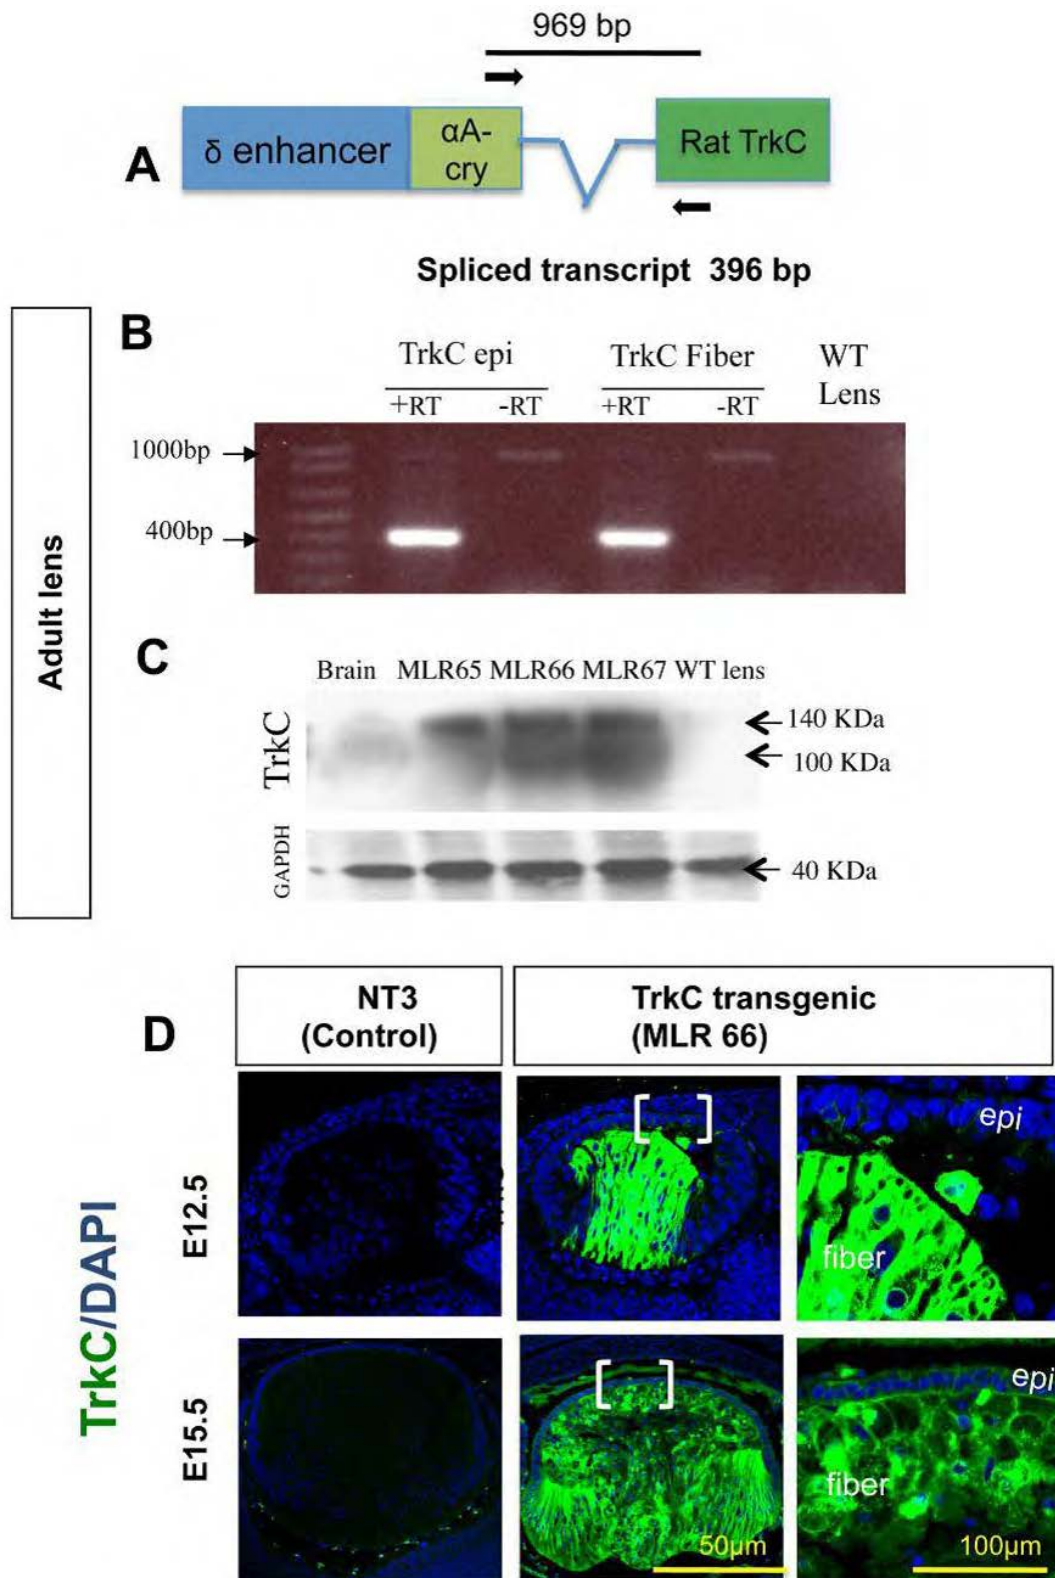

**Fig. S1. Three different transgenic lines expressing TrkC in the lens epithelium and fiber cells were produced.** (A) A transgenic construct was designed to express a rat TrkC cDNA under the regulatory control of a chimeric promoter consisting of the mouse  $\alpha$ A-crystallin promoter ( $\alpha$ A-cry) fused to the chicken  $\delta$ -crystallin enhancer. The cDNA and promoter were separated by a rabbit  $\beta$ -globin intron. Location of PCR primers used for genotyping and RT-PCR are indicated by arrows. (B) RT-PCR of lens RNA amplified a 396 bp band specifically from reverse-transcribed RNA samples from TrkC transgenic lens epithelial and lens fiber cells. A trace 969 bp band could be amplified from transgenic RNA samples that had not been reverse transcribed, representing unspliced RNA or contaminating genomic DNA. (C) Western blots using antibodies to TrkC-detected protein bands of 140 kDa and 100 kDa in lens protein homogenates from all three TrkC transgenic lines but no such signal was detected in wild-type lens homogenates. The western blot was stripped and probed with Gapdh antibodies as a protein loading control. (D) Immunohistochemistry to detect TrkC in MLR66 transgenic lenses revealed expression of TrkC protein by E12.5 in the fiber cells as well as weakly in the epithelial cells. By E15.5, strong expression of TrkC protein was observed in both epithelial and fiber cells of the transgenic lens. For the TrkC transgenic lens histology, the right-most panels represent higher magnifications of the bracketed regions of the adjacent panels. epi, lens epithelium; fiber, lens fiber cells.

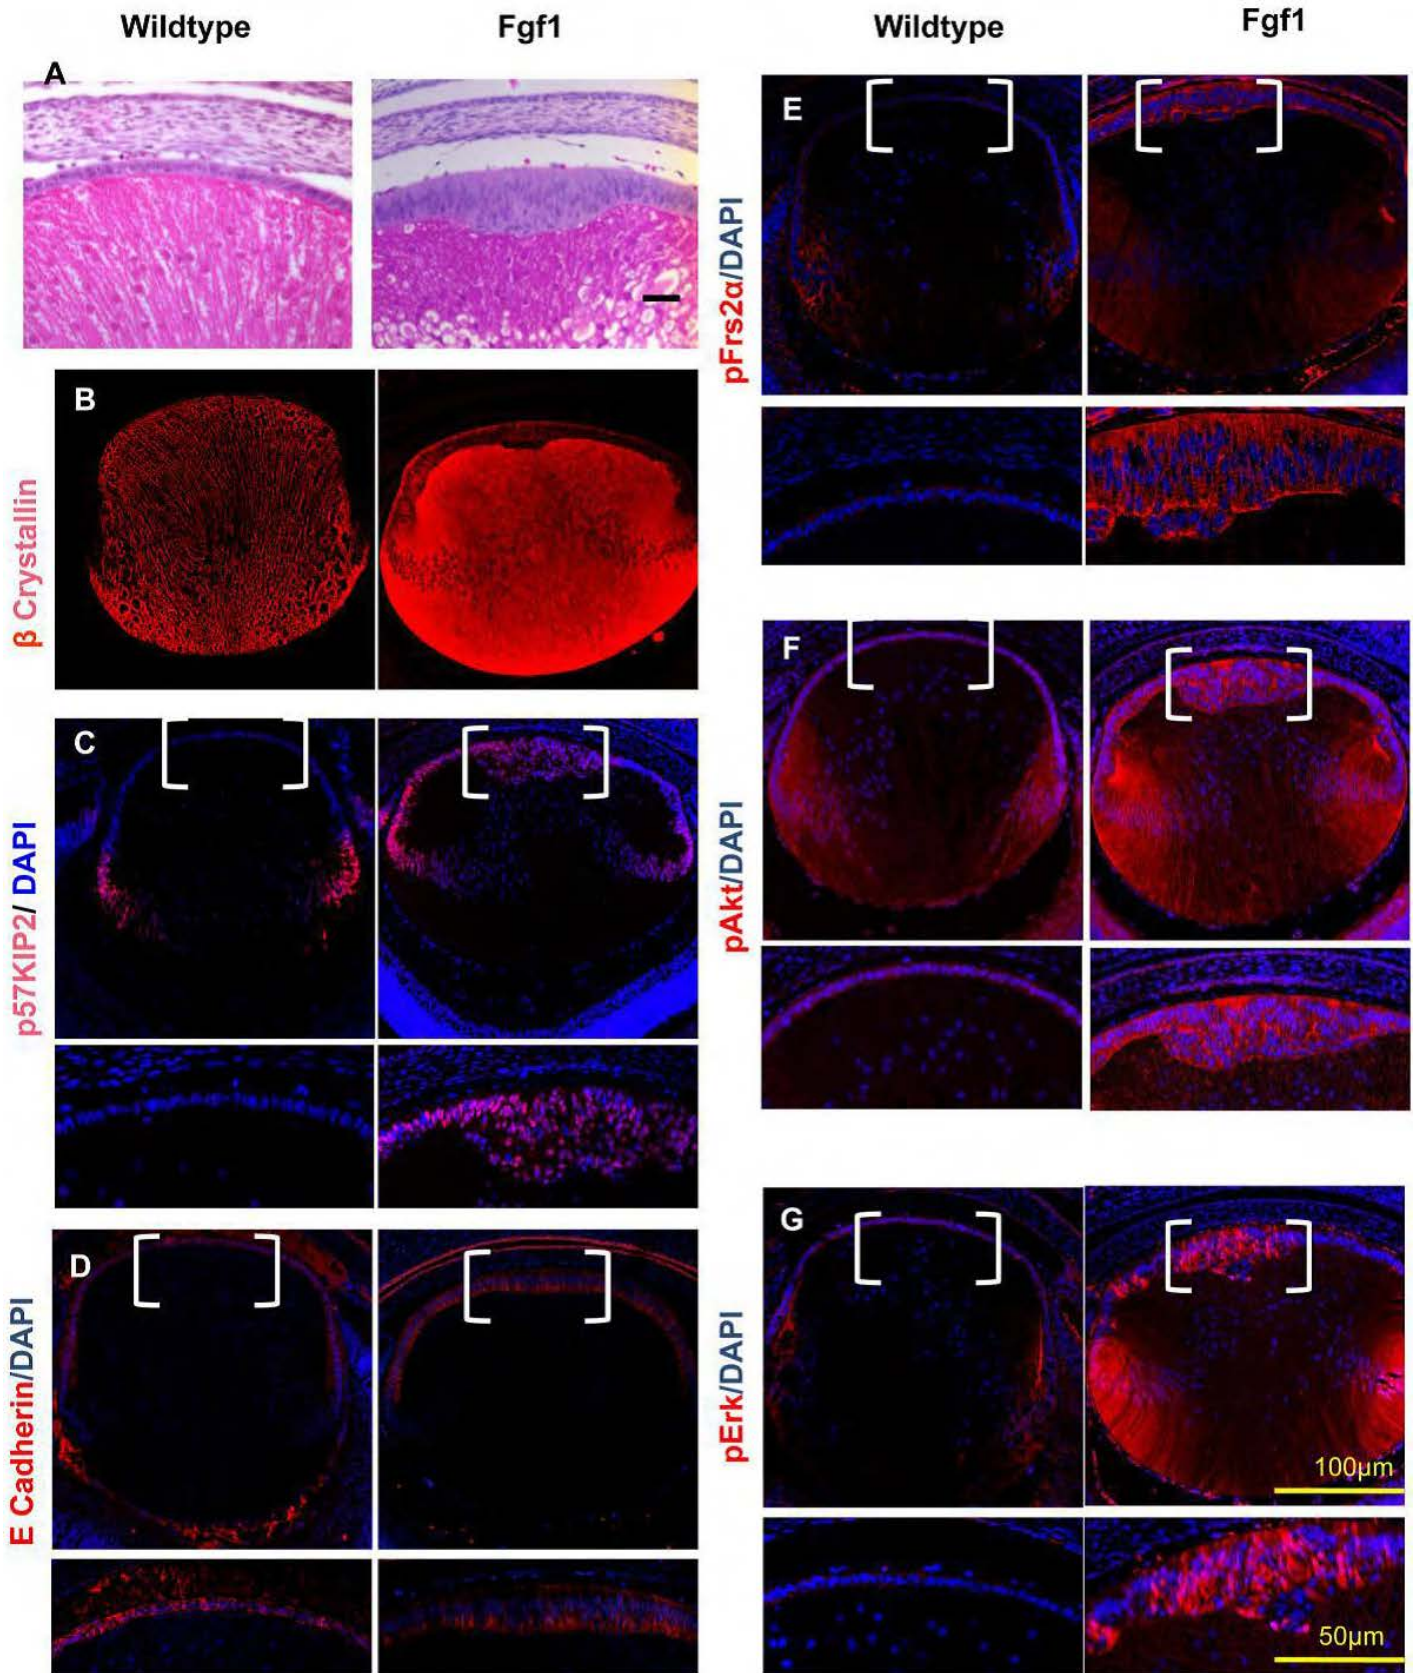

**Fig. S2. Expression of Fgf1 in the lens induces premature fiber cell differentiation and activation of Frs2 $\alpha$ , Erk and Akt.** (A-G) Fgf1 transgenic lenses at E15.5 have elongated lens epithelial cells (A), which express  $\beta$ -crystallin (B) and p57<sup>KIP2</sup> (C), normal characteristics of lens fiber cells. E-cadherin expression in the transgenic lens epithelium is reduced and stochastic relative to the wild-type lens epithelium (compare left and right panels in D). Transgenic expression of Fgf1 also induces activation (phosphorylation) of Frs2 $\alpha$  (E), Akt (F) and Erk (G) in the transgenic lens epithelium. The bracketed regions in C-G are shown at higher magnification below each bracketed panel.

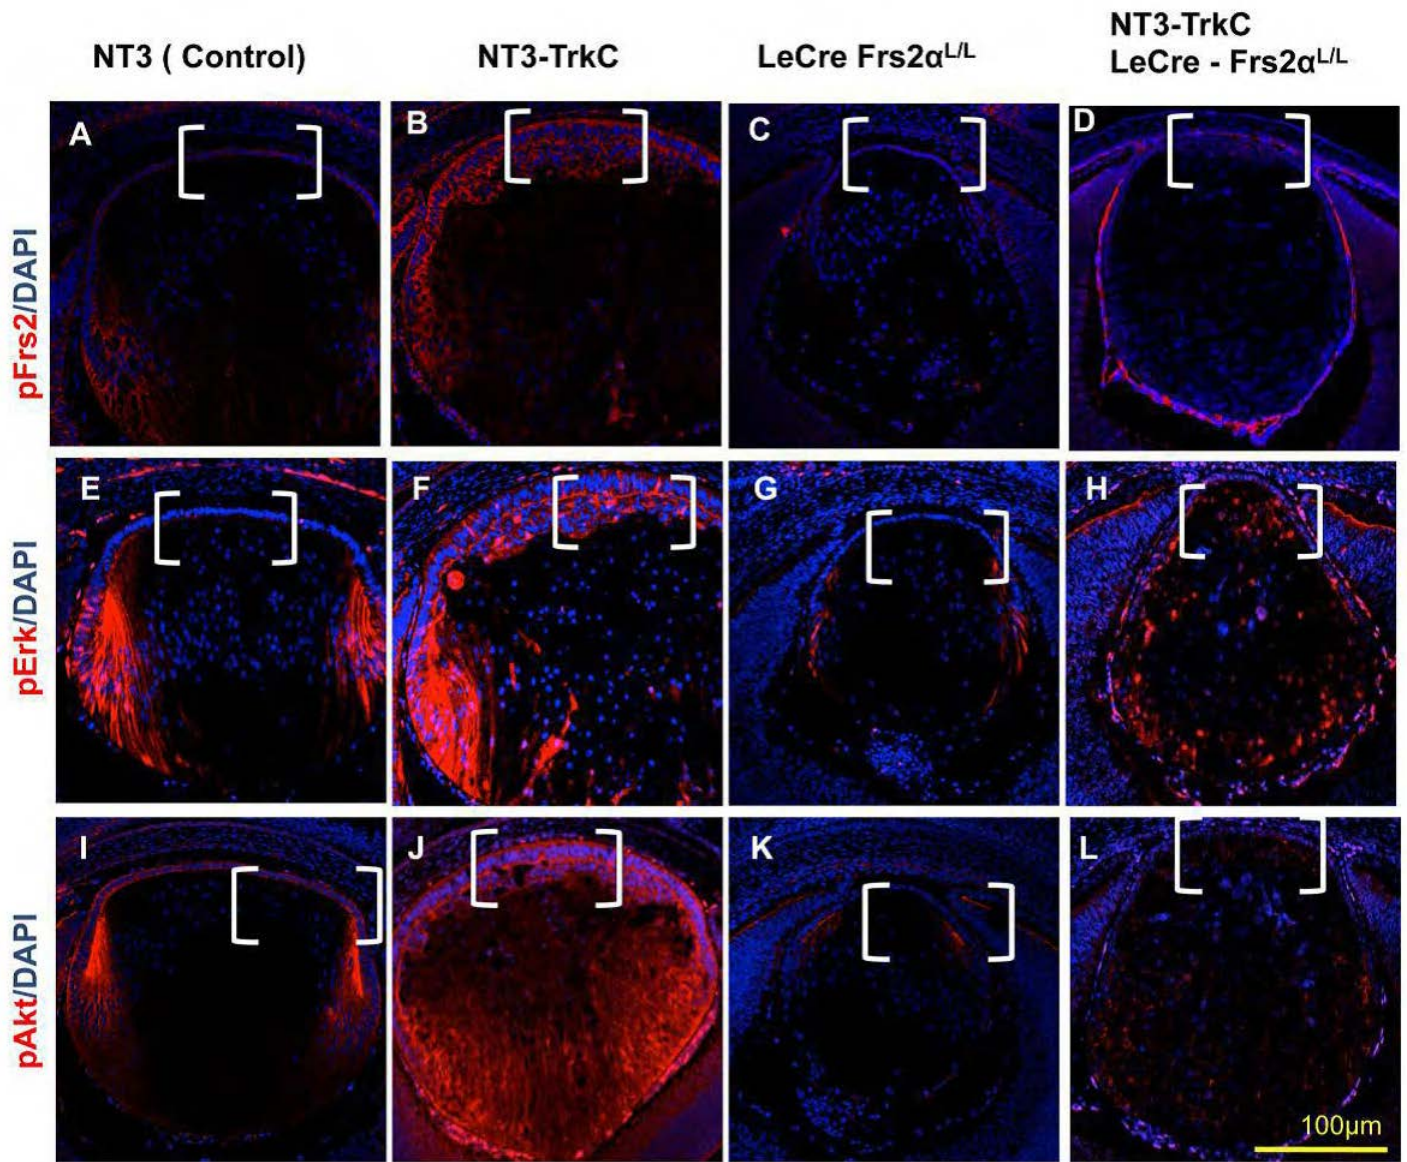

**Fig. S3. Activated TrkC signaling induces Frs2 $\alpha$ -dependent phosphorylation of Frs2 $\alpha$ , Erk and Akt in the lens.** (A-L) Lower magnification images for those seen in Fig. 8. Control (A,E,I), NT3-TrkC (B,F,J), Frs2 $\alpha$ -deficient (C,G,K) and NT3-TrkC lenses lacking Frs2 $\alpha$  (D,H,L) were analyzed at E15.5 to determine the activation (phosphorylation) state of Frs2 $\alpha$  (A-D), Erk (E-H) and Akt (I-L) in the lens. The bracketed regions are shown in higher magnification in Fig. 8.

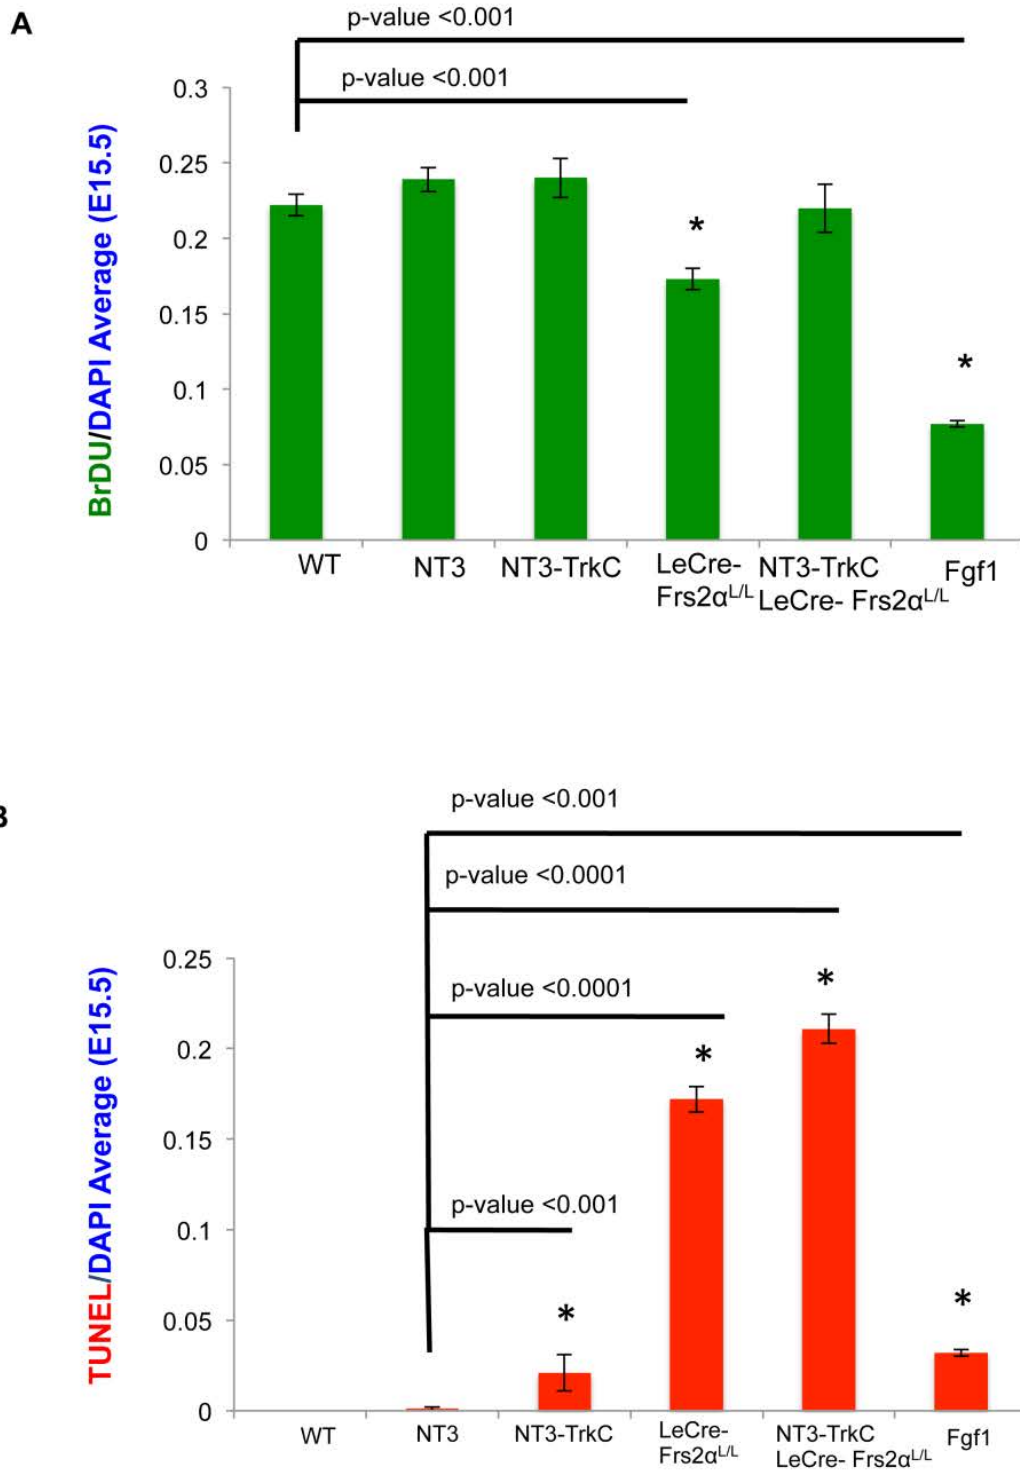

**Fig. S4. Comparison of proliferation and apoptosis among the genetically modified lenses at E15.5.** Proliferation rates were assayed by BrdU incorporation to determine the S-phase fraction of lens cells (A) and cell death was analyzed using the TUNEL assay (B) in E15.5 wild-type, NT3, NT3-TrkC, LeCre-Frs2 $\alpha^{L/L}$ , NT3-TrkC LeCre-Frs2 $\alpha^{L/L}$  and Fgf1 lenses. Cell proliferation was significantly decreased only in the LeCre-Frs2 $\alpha^{L/L}$  and Fgf1 lenses at E15.5 compared with wild type. Apoptosis was significantly increased in all the transgenics examined except NT3. Error bars represent s.e.m. Asterisks represent significant differences.

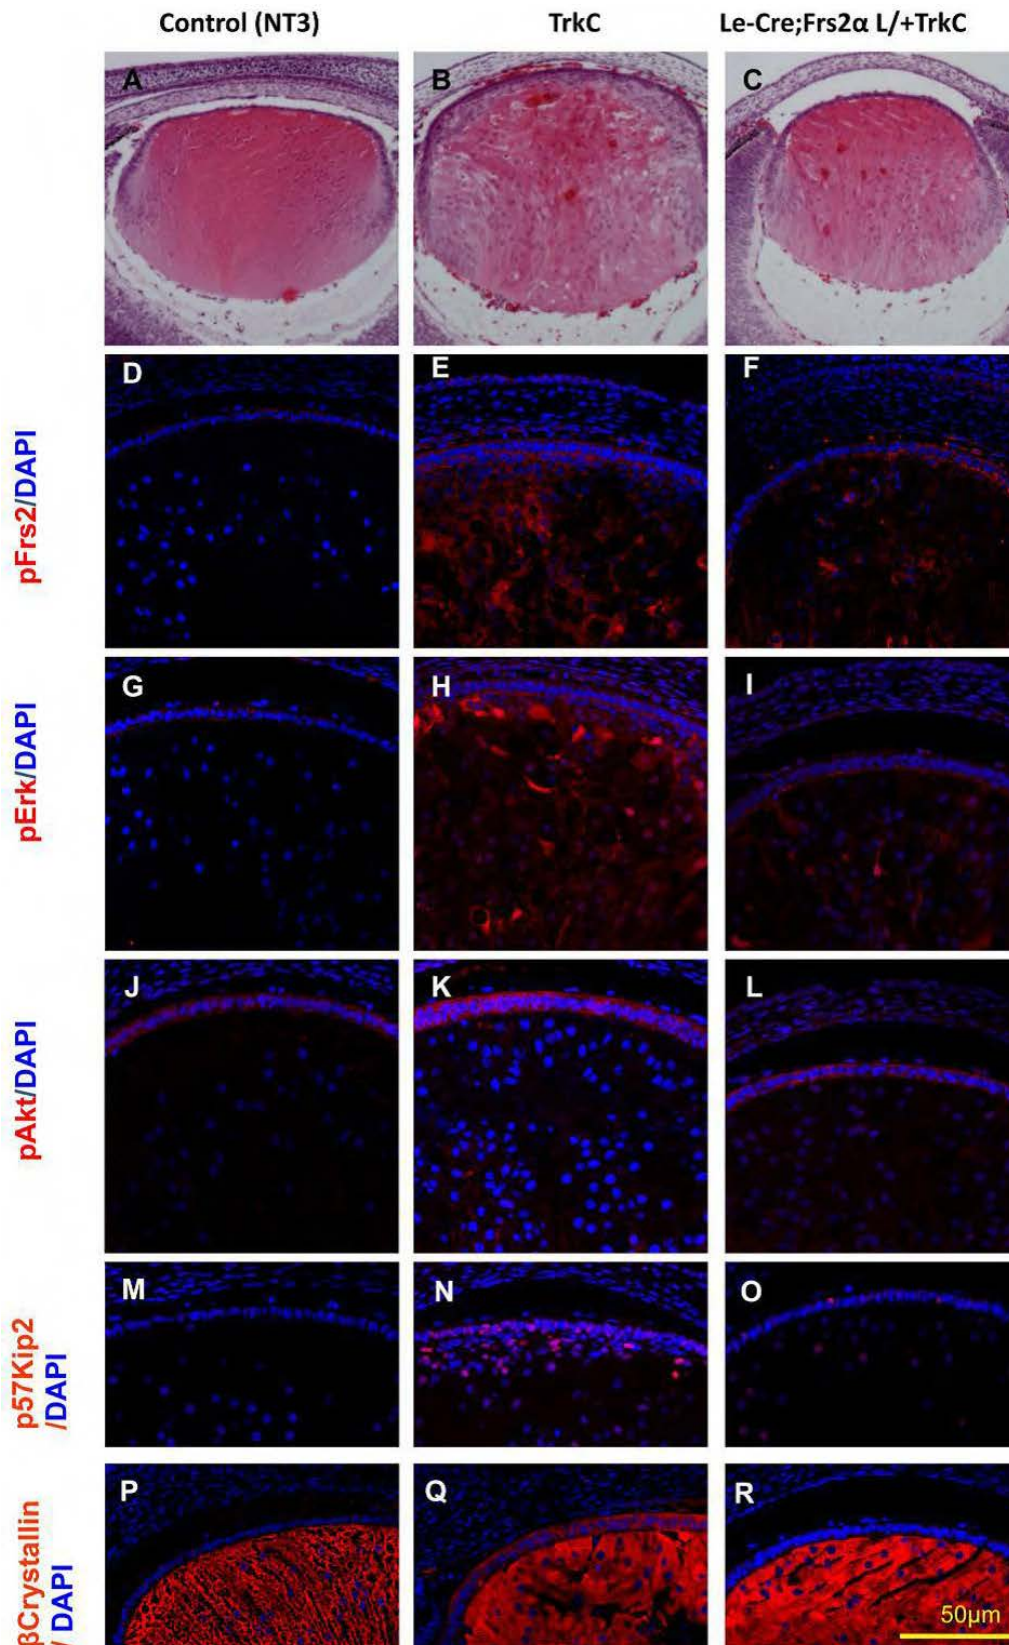

**Fig. S5. TrkC alone can induce modest fiber cell differentiation and increased Frs2 $\alpha$ , Erk and Akt activation that can be inhibited by the loss of a single allele of Frs2 $\alpha$ .** (A-R) E15.5 control NT3-transgenic embryos have normal lens morphology whereas the transgenic TrkC lenses exhibit slightly elongated lens epithelial cells, fiber cell dysmorphology and epithelial multilayering compared with control (compare A, B). Lens epithelial cells do not elongate in the TrkC transgenic lenses when one allele of Frs2 $\alpha$  is deleted and appear phenotypically similar to control lens (compare A, C). Control (D,G,J), TrkC (E,H,K) and TrkC lenses lacking one allele of Frs2 $\alpha$  (F,I,L) were analyzed at E15.5 to determine the activation (phosphorylation) state of Frs2 $\alpha$  (D-F), Erk (G-I) and Akt (J-L) in the lens epithelium. Compared with control lenses, TrkC lenses had increased activation of Frs2 $\alpha$  (compare D, E), Erk (compare G, H) and Akt (compare J, K) in the lens epithelium. However, this effect is Frs2 $\alpha$  dependent, as the loss of one allele of Frs2 $\alpha$  in the TrkC background results in expression levels of these proteins similar to that of control (compare D, F; G, I; J, L). Increased downstream signaling led to premature fiber cell differentiation in the TrkC lenses observed by the expression of fiber cell specific proteins p57<sup>KIP2</sup> (compare M, N) and  $\beta$ -crystallin (compare P, Q) in the epithelium; however, this effect is Frs2 $\alpha$  dependent (compare M, O; P, R).

**Table S1. Primers**

| <b>Gene</b>                     | <b>Primers for PCR</b>                                                     | <b>Expected size (bp)</b> |
|---------------------------------|----------------------------------------------------------------------------|---------------------------|
| Frs2 $\alpha$ cDNA              | F: TAT CCC CGC TAC CCC TCG TT<br>R: TGT TGC CCG GTC CAC TC                 | 420                       |
| Frs2 $\beta$ cDNA               | F: GCA CCT CGC CGA CCC TCC ACA A<br>R: GGC CAC TCC ACC CTC GCT CCT<br>CAG  | 410                       |
| TrkC cDNA                       | F: ACC CCC ACT TGC GTT AT<br>R: ATG CGG AAG AGG GGG AGT TGG                | 230                       |
| P75-NTR cDNA                    | F: GGC ACC TCC AGA ACA AGA CCT C<br>R: CCA CAA GGC CCA CAA CCA CAG C       | 156                       |
| GAPDH cDNA                      | F: AGG CCG GTG CTG AGT ATG TC<br>R: TGC CTG CTT CAC CAC CTT CT             | 530                       |
| TrkA cDNA                       | F: ACG GTA ACA GCA CAT CAA GAG<br>R: CGG AGG AAA CGG TTG AGG TC            | 610                       |
| ALK cDNA                        | F: AGC CTC CCA GCC CCG CCT TCT CT<br>R: CAG CTC TGA TTC CCG TGG TTG<br>TGC | 234                       |
| Ret cDNA                        | F: CTG GCC TCC TCT ACC TCA ATC<br>R: AGT GCC CAC CGA GTG CTC               | 412                       |
| Trk C transgene                 | F: ACC TGC CCT CCC ACC CTC TTC<br>R: GGC TGG CTG CTT GCT CTA TCA<br>CAC    | 401                       |
| Le-Cre transgene                | F: CCT GTT TTG CAC GTT CAC CG<br>R: ATG CTT CTG TCC GTT TGC CG             | 300                       |
| NT3 transgene                   | F: GCA TTC CAG CTG CTG ACG GT<br>R: TGA CTG GCC TGG CTT CTT TAC A          | 900                       |
| Fgfr2 wild type (WT) and floxed | F: CTC CAC TGA TTA CAT CTA AAG<br>AGC                                      | WT: 300                   |

|                                    |                                       |             |
|------------------------------------|---------------------------------------|-------------|
| allele for genotyping              | R: GTC AAT TCT AAG CCA CTG TCT<br>GCC | Floxed: 373 |
| Frs2_ wild type (WT) and<br>floxed | F: GAG TGT GCT GTG ATT GGA AGG<br>CAG | WT: 224     |
| allele for genotyping              | R: GGCACGAGTGTCTGCAGACACATG           | Floxed: 319 |

F, forward primer; R, reverse primer

**Table S2. Antibodies**

| <b>Primary antibody</b>    | <b>Dilution</b> | <b>Source</b>                                                                  |
|----------------------------|-----------------|--------------------------------------------------------------------------------|
| Anti-Frs2 $\alpha$         | 1:100           | Abcam, ab10425                                                                 |
| Anti-BrdU                  | 1:200           | Abcam, ab6326                                                                  |
| Anti-E-cadherin            | 1:100           | Abcam, ab15148                                                                 |
| Anti-Prox1                 | 1:150           | Abcam, ab37128                                                                 |
| Anti- $\beta$ -crystallins | 1:200           | Samuel Zigler, Johns Hopkins University School of Medicine, Baltimore, MD, USA |
| Anti-aquaporin0            | 1:100           | Abcam, ab15077                                                                 |
| Anti-pFrs2 $\alpha$        | 1:50            | R&D Systems, AF5126                                                            |
| Anti-p44/48ERK1/2          | 1:100           | Cell Signaling Technology, 9101                                                |
| Anti-pAkt (Ser473)         | 1:100           | Cell Signaling Technology, 9271                                                |
| Anti-p57KIP2               | 1:100           | Abcam, ab4058                                                                  |
| Anti-TrkC                  | 1:100           | Cell Signaling Technology, 3376                                                |
| Anti-GFP                   | 1:100           | Cell Signaling Technology, 2555                                                |
